# Supplementary material for: Talin is required for integrin-mediated platelet function in hemostasis and thrombosis
Source: PubMed Central journal article supplement — J Exp Med. 2007 Dec 24;204(13):3103–11. doi: 10.1084/jem.20071800 (PMC2150986; doi:10.1084/jem.20071800), 2007-12-24
Supplement: jexpmed_jem.20071800_5.pdf [file jexpmed_jem.20071800_5.pdf]

**Table S1. Hemograms of peripheral blood from 10-wk-old  $Tln1^{fl/fl} Cre^+$  and  $Tln1^{fl/fl} Cre^-$  mice**

|                                          | $Tln1^{fl/fl} Cre^+$ ( $n = 5$ ) |     | $Tln1^{fl/fl} Cre^-$ ( $n = 5$ ) |     | P-Value |
|------------------------------------------|----------------------------------|-----|----------------------------------|-----|---------|
|                                          | AVG                              | SEM | AVG                              | SEM |         |
| red blood cells ( $\times 10^9/L$ )      | 6.1                              | 0.2 | 8.6                              | 0.2 | 0.00002 |
| hemoglobin (g/L)                         | 9.6                              | 0.4 | 12.8                             | 0.3 | 0.0003  |
| hematocrit (%)                           | 37.5                             | 1.8 | 46.4                             | 0.8 | 0.002   |
| platelets ( $\times 10^9/L$ )            | 586                              | 49  | 755                              | 24  | 0.014   |
| white blood cells<br>( $\times 10^9/L$ ) | 3.5                              | 0.6 | 4.5                              | 0.5 | NS      |
| neutrophils ( $\times 10^9/L$ )          | 1149                             | 179 | 1645                             | 213 | NS      |
| lymphocytes ( $\times 10^9/L$ )          | 1831                             | 384 | 2383                             | 332 | NS      |
| monocytes ( $\times 10^9/L$ )            | 287                              | 73  | 347                              | 24  | NS      |
| eosinophils ( $\times 10^9/L$ )          | 109                              | 32  | 133                              | 30  | NS      |
